# Supplementary material for: Food Authentication: Truffle (Tuber spp.) Species Differentiation by FT-NIR and Chemometrics
Source: MDPI journal article supplement (doi:10.3390/foods9070922), 2020-07-13
Supplement: s1 [file s1]

## Supplementary Materials

### Food authentication: Truffle (*Tuber* spp.) species differentiation by FT-NIR and chemometrics

Torben Segelke <sup>1,‡</sup>, Stefanie Schelm <sup>1,‡</sup> Christian Ahlers <sup>1</sup> and Markus Fischer <sup>1,\*</sup>

<sup>1</sup> HAMBURG SCHOOL OF FOOD SCIENCE - Institute of Food Chemistry, University of Hamburg, Grindelallee 117, 20146 Hamburg, Germany; torben.segelke@chemie.uni-hamburg.de (T.S.); stefanie.schelm@chemie.uni-hamburg.de (S.S.); christian.ahlers-2@studium.uni-hamburg.de (C.A.); Markus.Fischer@uni-hamburg.de (M.F.)

‡ Authors contributed equally

\* Correspondence: Markus.Fischer@uni-hamburg.de; Tel.: +49-40-42838-4359

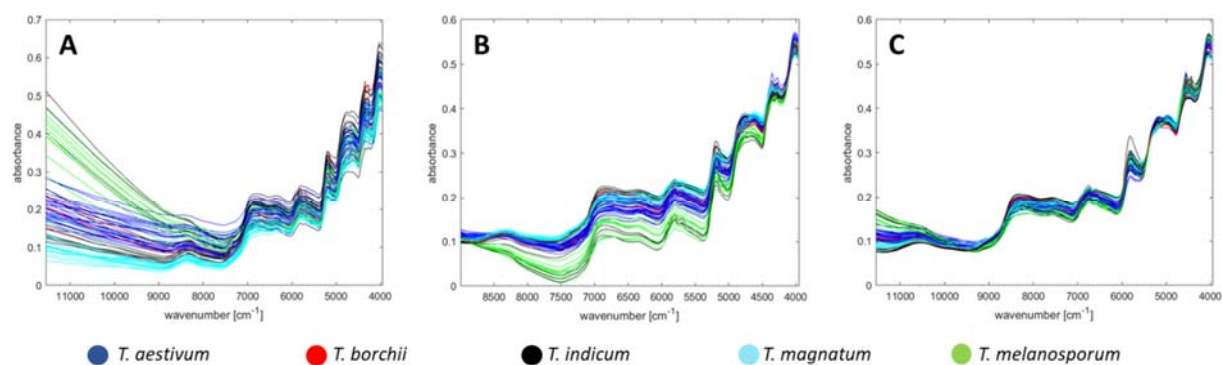

**Figure S1:** Influence of the order of pre-processing steps. (A) raw data. (B) MSC and omitting the > 9,000 cm⁻¹ range. (C) omitting the > 9,000 cm⁻¹ range first and MSC.

**Table S1:** Overview of the analysed truffle samples with number of samples, harvest year and country.

| <i>Tuber species</i>                       | geographical origin           | harvest year | number of samples |
|--------------------------------------------|-------------------------------|--------------|-------------------|
| <i>T. aestivum/</i><br><i>T. uncinatum</i> | unkown                        | 2018         | 7                 |
|                                            | Bulgaria                      | 2019         | 2                 |
|                                            | France                        | 2019         | 1                 |
|                                            | Iran                          | 2019         | 1                 |
|                                            | Italy                         | 2018         | 3                 |
|                                            | Italy                         | 2019         | 1                 |
|                                            | Italy, Tuscany, Florence      | 2018         | 1                 |
|                                            | Moldova                       | 2019         | 1                 |
|                                            | Romania                       | 2109         | 1                 |
|                                            | Romania, Bihor, Oradea        | 2017         | 2                 |
|                                            | Romania, Hunedoara, Deva      | 2017         | 1                 |
|                                            | Romania, Moldau, Bacau        | 2017         | 4                 |
|                                            | Romania, Salaj, Zalau         | 2017         | 1                 |
|                                            | Romania, South-Italy          | 2017         | 1                 |
|                                            | Romania, Timisoara            | 2019         | 1                 |
|                                            | Slovenia                      | 2019         | 1                 |
|                                            |                               |              | sum: 29           |
| <i>T. albidum</i>                          | Italy                         | 2018         | 1                 |
|                                            | Italy                         | 2019         | 1                 |
|                                            | Italy, Basilicata             | 2020         | 1                 |
|                                            | Italy, Emilia-Romagna, Faenza | 2019         | 1                 |
|                                            | Spain                         | 2019         | 1                 |
|                                            |                               |              | sum: 5            |
| <i>T. indicum</i>                          | China                         | 2017         | 1                 |
|                                            | China                         | 2018         | 3                 |
|                                            | China                         | 2019         | 4                 |
|                                            | China                         | 2020         | 2                 |
|                                            | China, Yunnan, Dali City      | 2019         | 1                 |
|                                            |                               |              | sum: 11           |
| <i>T. magnatum</i>                         | Bulgaria                      | 2019         | 1                 |
|                                            | Bulgaria, Sliven, Sliven      | 2018         | 1                 |
|                                            | Croatia                       | 2019         | 1                 |
|                                            | Croatia, Istria, Buzet        | 2018         | 1                 |
|                                            | Italy                         | 2018         | 3                 |
|                                            | Italy, Abruzzo, L'Aquila      | 2018         | 1                 |
|                                            | Italy, Campania, Naples       | 2018         | 1                 |
|                                            | Italy, Lazio, Rome            | 2018         | 1                 |
|                                            | Italy, Marche, Ancona         | 2018         | 1                 |
|                                            | Italy, Molise, Campobasso     | 2018         | 1                 |
|                                            | Italy, Piedmont               | 2019         | 1                 |
|                                            | Italy, Piedmont, Turin        | 2018         | 1                 |
|                                            | Italy, Romagna                | 2018         | 1                 |
|                                            | Italy, Savigno                | 2019         | 1                 |

**Table S1 continued**

| <i>Tuber species</i>   | geographical origin                 | harvest year | number of samples |
|------------------------|-------------------------------------|--------------|-------------------|
| <i>T. magnatum</i>     | Italy, Tuscany                      | 2019         | 1                 |
|                        | Italy, Umbria, Perugia              | 2018         | 1                 |
|                        | Romania                             | 2019         | 1                 |
|                        | Romania, Targu Jiu, Targu Jiu       | 2018         | 1                 |
|                        |                                     |              | sum: 20           |
| <i>T. melanosporum</i> | Australia                           | 2018         | 1                 |
|                        | Australia                           | 2019         | 1                 |
|                        | France                              | 2018         | 1                 |
|                        | France, Languedoc, Laudun-l'Ardoise | 2019         | 1                 |
|                        | Italy, Abruzzo                      | 2020         | 1                 |
|                        | Italy, Marche                       | 2018         | 1                 |
|                        | Spain, Teruel, Sarrion              | 2019         | 1                 |
|                        | Spain, Valencia, Castellon          | 2019         | 3                 |
|                        |                                     |              | sum: 10           |

**Table S2:** Mean accuracy and precision of the training set used for validation for different pre-treatment and classification models for the differentiation of the white truffle species (20 *T. magnatum* samples, 5 *T. borchii* samples, all values in %).

|                |                                                | classification model |             |              |            |            |                 |
|----------------|------------------------------------------------|----------------------|-------------|--------------|------------|------------|-----------------|
|                |                                                | a) LDA               | b) lin. SVM | c) quad. SVM | d) SSD     | e) RF      | f) <i>k</i> -NN |
| pre-processing | i) MSC                                         | 96.2 ± 3.7           | 91.6 ± 2.6  | 90.7 ± 3.5   | 94.0 ± 3.2 | 86.2 ± 4.6 | 97.4 ± 2.6      |
|                | ii) MSC, 1 <sup>st</sup> derivative            | 99.3 ± 1.5           | 93.0 ± 2.6  | 96.1 ± 3.1   | 94.4 ± 3.7 | 89.2 ± 2.9 | 96.1 ± 2.1      |
|                | iii) MSC, 2 <sup>nd</sup> derivative           | 95.8 ± 2.1           | 98.3 ± 2.4  | 98.0 ± 2.5   | 98.8 ± 1.6 | 80.7 ± 7.9 | 96.3 ± 2.2      |
|                | iv) MSC, detrend                               | 95.8 ± 3.4           | 85.6 ± 4.0  | 92.0 ± 2.6   | 94.0 ± 2.2 | 79.1 ± 7   | 88.1 ± 3.2      |
|                | v) smoothing, MSC, 1 <sup>st</sup> derivative  | 99.1 ± 1.6           | 93.6 ± 3.1  | 97.3 ± 2.6   | 94.7 ± 3.5 | 85.7 ± 3   | 95.8 ± 2.8      |
|                | vi) smoothing, MSC, 2 <sup>nd</sup> derivative | 96.1 ± 2.4           | 93.9 ± 2.8  | 96.2 ± 2.7   | 94.3 ± 3.4 | 86.3 ± 3.8 | 95.8 ± 2.9      |
|                | vii) smoothing, MSC, detrend                   | 96.0 ± 3.8           | 98.6 ± 2.2  | 97.8 ± 2.5   | 98.1 ± 1.9 | 79.8 ± 7.1 | 96.1 ± 2.1      |

**Table S3:** Mean accuracy and precision of the training set used for validation for different pre-treatment and classification models for the differentiation of the black truffle species (29 *T. aestivum* samples, 10 *T. melanosporum* samples and 11 *T. indicum* samples, all values in %).

|                |                                                | classification model |             |              |            |            |                 |
|----------------|------------------------------------------------|----------------------|-------------|--------------|------------|------------|-----------------|
|                |                                                | a) LDA               | b) lin. SVM | c) quad. SVM | d) SSD     | e) RF      | f) <i>k</i> -NN |
| pre-processing | i) MSC                                         | 94.4 ± 2.9           | 92.0 ± 2.2  | 89.8 ± 1.9   | 97.4 ± 1.2 | 84.0 ± 4.5 | 87.6 ± 1.9      |
|                | ii) MSC, 1 <sup>st</sup> derivative            | 96.0 ± 1.5           | 88.4 ± 4.5  | 86.8 ± 2.1   | 95.8 ± 1.7 | 77.6 ± 4.7 | 85.9 ± 4.3      |
|                | iii) MSC, 2 <sup>nd</sup> derivative           | 83.4 ± 4.4           | 88.3 ± 5.0  | 91.3 ± 2.4   | 95.5 ± 1.3 | 78.6 ± 6.0 | 85.6 ± 3.6      |
|                | iv) MSC, detrend                               | 95.0 ± 3.2           | 60.2 ± 4.2  | 72.3 ± 4.4   | 77.3 ± 3.6 | 67.7 ± 9.2 | 58.9 ± 4.5      |
|                | v) smoothing, MSC, 1 <sup>st</sup> derivative  | 96.0 ± 1.5           | 88.5 ± 3.9  | 86.9 ± 2.3   | 95.9 ± 1.8 | 82.8 ± 3.7 | 85.9 ± 3.8      |
|                | vi) smoothing, MSC, 2 <sup>nd</sup> derivative | 95.9 ± 2.8           | 89.8 ± 3.8  | 86.6 ± 2.3   | 96.1 ± 1.8 | 81.7 ± 3.6 | 86.3 ± 3.5      |
|                | vii) smoothing, MSC, detrend                   | 94.8 ± 2.5           | 90.0 ± 4.3  | 91.5 ± 2.2   | 95.9 ± 1.2 | 78.7 ± 7.2 | 86.2 ± 3.1      |

**Table S4:** Confusion matrix for classification of the white truffle species with the build linear SVM model after MSC and 1<sup>st</sup> derivative; resulting in 100% mean sensitivity. The predictions of 100 repetitions of the test set were accumulated.

|                |                    | predicted species  |                   |                 |
|----------------|--------------------|--------------------|-------------------|-----------------|
|                |                    | <i>T. magnatum</i> | <i>T. borchii</i> | sensitivity [%] |
| actual species | <i>T. magnatum</i> | 2000               |                   | 100             |
|                | <i>T. borchii</i>  |                    | 500               | 100             |
|                | specificity [%]    | 100                | 100               | 100             |

**Table S5:** Mean accuracy with standard deviation for different pre-treatment and classification models for the prediction of the test set for the differentiation of five truffle species (20 *T. magnatum* samples, 5 *T. borchii* samples, 29 *T. aestivum* samples, 10 *T. melanosporum* samples and 11 *T. indicum* samples, all values in %).

|                |                                                | classification model |             |              |                   |            |            |
|----------------|------------------------------------------------|----------------------|-------------|--------------|-------------------|------------|------------|
|                |                                                | a) LDA               | b) lin. SVM | c) quad. SVM | d) SSD            | e) RF      | f) k-NN    |
| pre-processing | i) MSC                                         | 99.2 ± 0.8           | 82.8 ± 1.3  | 90.7 ± 2.0   | 99.3 ± 1.0        | 87.9 ± 2.3 | 95.9 ± 1.5 |
|                | ii) MSC, 1 <sup>st</sup> derivative            | 99.2 ± 0.8           | 85.3 ± 1.4  | 94.3 ± 1.2   | <b>99.3 ± 0.9</b> | 86.9 ± 2.2 | 96.1 ± 1.5 |
|                | iii) MSC, 2 <sup>nd</sup> derivative           | 94.5 ± 1.9           | 75.0 ± 2.0  | 91.0 ± 1.8   | 93.9 ± 1.9        | 79.6 ± 2.7 | 89.3 ± 2.5 |
|                | iv) MSC, detrend                               | 99.2 ± 0.7           | 83.1 ± 1.3  | 88.1 ± 2.2   | 99.2 ± 1.1        | 88.2 ± 2.3 | 96.4 ± 1.7 |
|                | v) smoothing, MSC, 1 <sup>st</sup> derivative  | 99.3 ± 0.9           | 86.2 ± 3.4  | 95.0 ± 3.5   | 99.2 ± 3.8        | 87.3 ± 3.8 | 96.0 ± 2.5 |
|                | vi) smoothing, MSC, 2 <sup>nd</sup> derivative | 95.9 ± 1.8           | 88.6 ± 1.9  | 93.7 ± 1.7   | 98.2 ± 1.2        | 86.4 ± 3.6 | 92.8 ± 2   |
|                | vii) smoothing, MSC, detrend                   | 99.3 ± 0.7           | 83.0 ± 1.2  | 88.6 ± 1.9   | 99.3 ± 1.1        | 88.9 ± 2.4 | 95.8 ± 1.8 |

**Table S6:** Mean accuracy and precision of the training set for different pre-treatment and classification models for the differentiation of the five truffle species (20 *T. magnatum* samples, 5 *T. borchii* samples, 29 *T. aestivum* samples, 10 *T. melanosporum* samples and 11 *T. indicum* samples, all values in %).

|                |                                                | classification model |             |              |            |            |            |
|----------------|------------------------------------------------|----------------------|-------------|--------------|------------|------------|------------|
|                |                                                | a) LDA               | b) lin. SVM | c) quad. SVM | d) SSD     | e) RF      | f) k-NN    |
| pre-processing | i) MSC                                         | 97.1 ± 1.7           | 83.9 ± 2.4  | 86.7 ± 2.6   | 97.1 ± 0.9 | 80.5 ± 4.4 | 87.1 ± 2.5 |
|                | ii) MSC, 1 <sup>st</sup> derivative            | 96.6 ± 1.7           | 86.5 ± 2    | 86.2 ± 2.2   | 97 ± 1     | 71.1 ± 5   | 87 ± 3.1   |
|                | iii) MSC, 2 <sup>nd</sup> derivative           | 80.8 ± 3.5           | 86.6 ± 2.4  | 89 ± 1.8     | 96.2 ± 1.1 | 67.6 ± 6.1 | 87.6 ± 3.1 |
|                | iv) MSC, detrend                               | 97.1 ± 1.6           | 62.3 ± 3.6  | 71.8 ± 3.1   | 76.8 ± 3.2 | 67.3 ± 6.8 | 56.8 ± 4.1 |
|                | v) smoothing, MSC, 1 <sup>st</sup> derivative  | 97.1 ± 1.4           | 87.4 ± 2.3  | 85.4 ± 2.4   | 97.1 ± 1.1 | 71.7 ± 3.4 | 86 ± 3.1   |
|                | vi) smoothing, MSC, 2 <sup>nd</sup> derivative | 86.3 ± 4.1           | 86.9 ± 2.4  | 85 ± 2.3     | 96.9 ± 1.2 | 72 ± 3.3   | 86.5 ± 3   |
|                | vii) smoothing, MSC, detrend                   | 96.9 ± 1.5           | 87.1 ± 2.5  | 89.5 ± 1.5   | 96.8 ± 1   | 70.3 ± 5.1 | 86.9 ± 2.3 |

**Table S7:** Confusion matrix for classification of five truffle species with the build subspace discriminant model after MSC and 1<sup>st</sup> derivative; resulting in 99.3 ± 0.9% mean sensitivity. The predictions of 100 repetitions of the test set were accumulated.

|                |                        | predicted species |                    |                    |                        |                   | sensitivity [%] |
|----------------|------------------------|-------------------|--------------------|--------------------|------------------------|-------------------|-----------------|
|                |                        | <i>T. indicum</i> | <i>T. aestivum</i> | <i>T. magnatum</i> | <i>T. melanosporum</i> | <i>T. borchii</i> |                 |
| actual species | <i>T. indicum</i>      | 1077              | 0                  | 0                  | 23                     | 0                 | 97.9            |
|                | <i>T. aestivum</i>     | 0                 | 2900               | 0                  | 0                      | 0                 | 100             |
|                | <i>T. magnatum</i>     | 0                 | 22                 | 1978               | 0                      | 0                 | 98.9            |
|                | <i>T. melanosporum</i> | 1                 | 0                  | 0                  | 999                    | 0                 | 99.9            |
|                | <i>T. borchii</i>      | 0                 | 0                  | 0                  | 0                      | 500               | 100             |
|                | specificity [%]        | 99.9              | 99.2               | 100                | 97.7                   | 100               |                 |

**Table S8:** Mean accuracy and precision of the training set for different pre-treatment and classification models for the differentiation of Italian vs. non-Italian *T. magnatum* truffles (all values in %).

|                |                                                | classification model |             |              |             |             |                 |
|----------------|------------------------------------------------|----------------------|-------------|--------------|-------------|-------------|-----------------|
|                |                                                | a) LDA               | b) lin. SVM | c) quad. SVM | d) SSD      | e) RF       | f) <i>k</i> -NN |
| pre-processing | i) MSC                                         | 48.3 ± 14            | 65.4 ± 4.5  | 50.0 ± 8.8   | 50.3 ± 9.9  | 47.6 ± 10.3 | 44.6 ± 7.8      |
|                | ii) MSC, 1 <sup>st</sup> derivative            | 51.5 ± 8.5           | 67 ± 4.4    | 49.2 ± 9.8   | 47.4 ± 10.5 | 40.6 ± 11.5 | 46.8 ± 8.5      |
|                | iii) MSC, 2 <sup>nd</sup> derivative           | 63.7 ± 6.8           | 71.7 ± 2.6  | 57.3 ± 6.5   | 56.5 ± 4.8  | 52.5 ± 15   | 50.5 ± 9.6      |
|                | iv) MSC, detrend                               | 46.9 ± 12            | 72.7 ± 2.3  | 65.2 ± 5.6   | 67.2 ± 4.8  | 61.3 ± 17.5 | 51.4 ± 11.3     |
|                | v) smoothing, MSC, 1 <sup>st</sup> derivative  | 50.3 ± 8.9           | 65.3 ± 4.7  | 48.2 ± 10.2  | 46.5 ± 8.7  | 49.7 ± 13.2 | 50.2 ± 8.7      |
|                | vi) smoothing, MSC, 2 <sup>nd</sup> derivative | 51.8 ± 9.9           | 65.2 ± 5.9  | 47.1 ± 10.1  | 47.6 ± 9.8  | 49.4 ± 12   | 49.8 ± 9.0      |
|                | vii) smoothing, MSC, detrend                   | 45.8 ± 13            | 70.8 ± 3.4  | 55.2 ± 6.3   | 54.4 ± 6.4  | 47.2 ± 13.4 | 45.8 ± 9.2      |

### MATLAB function for the creation of stratified parts for the nested cross validation:

```
function [y,z] = create_strat_parts(x,c,k)
% function gives back stratified parts for a nested cross validation in y
% with their respective categories in z.
% function divides matrix x with its categories in c in k parts
% stratifiedly distributed
%x: matrix with values which is ought to split into stratified parts
%c: numerical categories of the samples in x
%k: number of stratified parts to create

% written by Torben Segelke, Hamburg School of Food Science, 200405,200411

%Schritt1: Bereiche festlegen, neue Matrizen festlegen
sz=size(x); %sz ist ein 1x2-vector mit der Anzahl an Zeilen mal Spalten
rest=mod(sz(1,1),k);
anz=(sz(1,1)-rest)/k; %in jedem der k Parts sind mindestens anz Proben

h=zeros(max(c),2); %für den categorialen Vektor c ermitteln, wie viele
%Proben jeweils pro Kategorie vorkommen und dies in Matrix h speichern, dann
%über zwei for schleifen füllen
for i=1:max(c)
    h(i,1)=i;
end
for i=1:length(c)
    h(c(i,1),2)=h(c(i,1),2)+1;
end

%die Matrix a aufdröseln je nach Kategorie und in neuer matrix eintragen,
%dafür erst Bereich festlegen, dann füllen
for i=1:max(c)
    xneu{i}=zeros(h(i,2),sz(1,2));
    counter{i}=ones(1,1);
end
for i=1:length(c)
    xneu{c(i,1)}(counter{c(i,1)},:)=x(i,:);
    counter{c(i,1)}(1,1)=counter{c(i,1)}(1,1)+1;
end

%Schritt2: leere Parts erstellen
if rest==0
    for i=1:k
        y{i}=zeros(anz,sz(1,2));
        z{i}=zeros(anz,1);
    end
else
    for i=1:rest %i=k-rest+1:k
        y{i}=zeros(anz+1,sz(1,2));
        z{i}=zeros(anz+1,1);
    end
    for i=rest+1:k %i=1:k-rest
        y{i}=zeros(anz,sz(1,2));
        z{i}=zeros(anz,1);
    end
end

%Schritt3: Parts erstellen, Zufallsvektoren definieren
for i=1:max(c)
    zfl1{i}=1:h(i,2);
```



```

    zfl1{i}=zfl1{i}'; %invertieren
    zfl1{i}=zfl1{i}(randperm(length(zfl1{i}))); %zufallsdurchmischen

end

for i=1:k %wie bereits oben schonmal eine ZählVariable einführen, damit das
Programm in den Folge-Schleifen weiß, wo die nächste Variable
hingeschrieben werden soll
countP{i}=ones(1,1);
end
for i=1:max(c) %wie bereits oben schonmal eine ZählVariable einführen, ruft
hier den zufallsvektor nacheinander ab
countz{i}=ones(1,1);
end
countk=1; %um die Nachzügler zu verteilen

%hier beginnt die eigentliche Schleife zum Verteilen
for i=1:max(c)
    if mod(h(i,2),k)==0 %wenn diese Abfrage stimmt, liegen für eine
Kategorie n*k Proben vor, sodass perfekt verteilt werden kann
        n=h(i,2)/k; %wie viele n liegen vor?
        for nn=1:n
            for j=1:k
                y{j}(countP{j}(1,1),:)=xneu{i}(zfl1{i}(countz{i},1),:);
                z{j}(countP{j}(1,1),1)=i;
                countz{i}(1,1)=countz{i}(1,1)+1;
                countP{j}(1,1)=countP{j}(1,1)+1;
            end
        end
    else %hier geht es nicht perfekt auf
        n=(h(i,2)-mod(h(i,2),k))/k; %wie viele Runden können normal
durchgeführt werden?
        for nn=1:n
            for j=1:k
                y{j}(countP{j}(1,1),:)=xneu{i}(zfl1{i}(countz{i},1),:);
                z{j}(countP{j}(1,1),1)=i;
                countz{i}(1,1)=countz{i}(1,1)+1;
                countP{j}(1,1)=countP{j}(1,1)+1;
            end
        end
        %weitere Runden für die Nachzügler:
        nnach=h(i,2)-n*k; %wie viele Proben noch zuverteilen
        for nn=1:nnach
            y{countk}(countP{countk}(1,1),:)=xneu{i}(zfl1{i}(countz{i},1),:);
            z{countk}(countP{countk}(1,1),1)=i;
            countz{i}(1,1)=countz{i}(1,1)+1;
            countP{countk}(1,1)=countP{countk}(1,1)+1;
            if countk==k %um countk ggf zu resettten
                countk=1;
            else
                countk=countk+1;
            end
        end
    end

end

end

end

```
